# Supplementary material
Source: publisher figshare collection journal article supplement (https://sage.figshare.com/ndownloader/files/17360342)
Supplement: Supplementary file 1 [file 17360342]

**MAL Administration**

To reduce the cognitive burden of the MAL instructions and standardize the ratings, a 5-minute video depicting hemiparetic individuals performing 5 different MAL tasks at each quality rating was shown to the participant immediately prior to MAL administration. The participant also had access to a “cheat sheet” of numeric ratings and their corresponding verbal descriptions so that they did not have the cognitive “overhead” of maintaining the scale in memory. The participant could indicate a response by either pointing to a rating on the “cheat sheet” or, more commonly, providing a verbal numeric response. Per the MAL manual, a verbal prompt followed each numeric rating. For example, the examiner would state “You needed help from the other hand?” when the participant indicated a Quality of Movement rating of 2. The participant would then acknowledge agreement with this prompt or change his/her answer, as appropriate. This ensured that the participant’s numeric rating matched the intended verbal description.
